# Supplementary material
Source: PubMed Central journal article supplement (PMC3173064)
Supplement: supp_M111.264374_jbc.M111.264374-1.pdf [file supp_M111.264374_jbc.M111.264374-1.pdf]

**MULTI-LIGAND SPECIFICITY OF PATHOGEN ASSOCIATED MOLECULAR PATTERNS-BINDING SITE IN PEPTIDOGLYCAN RECOGNITION PROTEIN**

Pradeep Sharma<sup>1</sup>, Divya Dube<sup>1</sup>, Mau Sinha<sup>1</sup>, Biswajit Mishra<sup>1</sup>, Sharmistha Dey<sup>1</sup>, Gorakh Mal<sup>2</sup>, K. M. L. Pathak<sup>2</sup>, Punit Kaur<sup>1</sup>, Sujata Sharma<sup>1</sup> and Tej P. Singh<sup>1\*</sup>

<sup>1</sup>Department of Biophysics, All India Institute of Medical Sciences, New Delhi, India.

<sup>2</sup>National Research Center on Camels, Bikaner, India.

**Running title:** Multi-ligand binding site in CPGRP-S

**Keywords:** PGRP-S, PAMPs, Crystal structure, Innate immunity, Peptidoglycan, GlcNAc, Maltose

**Abbreviations:** CPGRP-S, Camel peptidoglycan recognition protein-S; PAMPs, Pathogen-associated molecular patterns; GlcNAc, N-acetylglucosamine; PGN, Peptidoglycan; MDP, Muramyl dipeptide.

**\*Author for correspondence:**

Tej P. Singh  
Department of Biophysics  
All India Institute of Medical Sciences  
Ansari Nagar, New Delhi – 110 029  
India  
Tel : +91-11-2658-8931  
FAX: +91-11-2658-8663  
E-mail: [tpsingh.aiims@gmail.com](mailto:tpsingh.aiims@gmail.com)

## LEGENDS TO FIGURES

**Figure S1.** SPR sensograms for the bindings of (A) MDP and (B) GlcNAc and  $\beta$ -maltose with CPGRP-S. The protein was immobilized on CM-5 chip and increasing concentrations (1.4mM, 2.5mM and 5.0mM) of analytes MDP and GlcNAc/ $\beta$ -maltose were used in mobile phase in separate experiments corresponding to the curves a, b and c respectively.

**Figure S2.** Cartoon diagram showing the position of MDP (represented as the space filling model). The grid lines indicate the presence of intermolecular hydrogen bonded interactions in the tetramer.

**Figure S3.** Cartoon diagram showing the positions of GlcNAc and  $\beta$ -maltose in the binding cleft of the interface of molecules C and D. The grid lines indicate the presence of intermolecular hydrogen bonded interactions in the tetramer.

**Figure S4.** Alignment of the amino acid sequences of PGRP-S from various species. Cys residues are highlighted in yellow. The important residues responsible for the dimerization of molecules C and D and key to the formation of multi-ligand binding site are indicated in cyan.

Figure S1 (A)

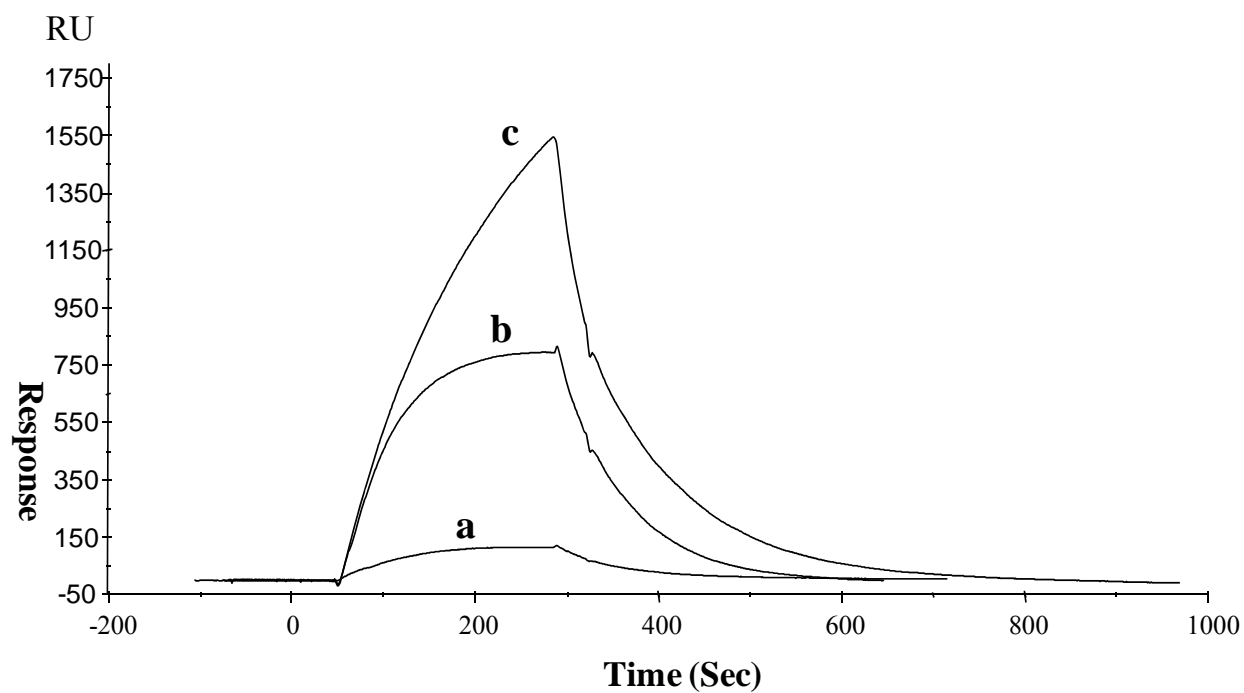

Figure S1 (B)

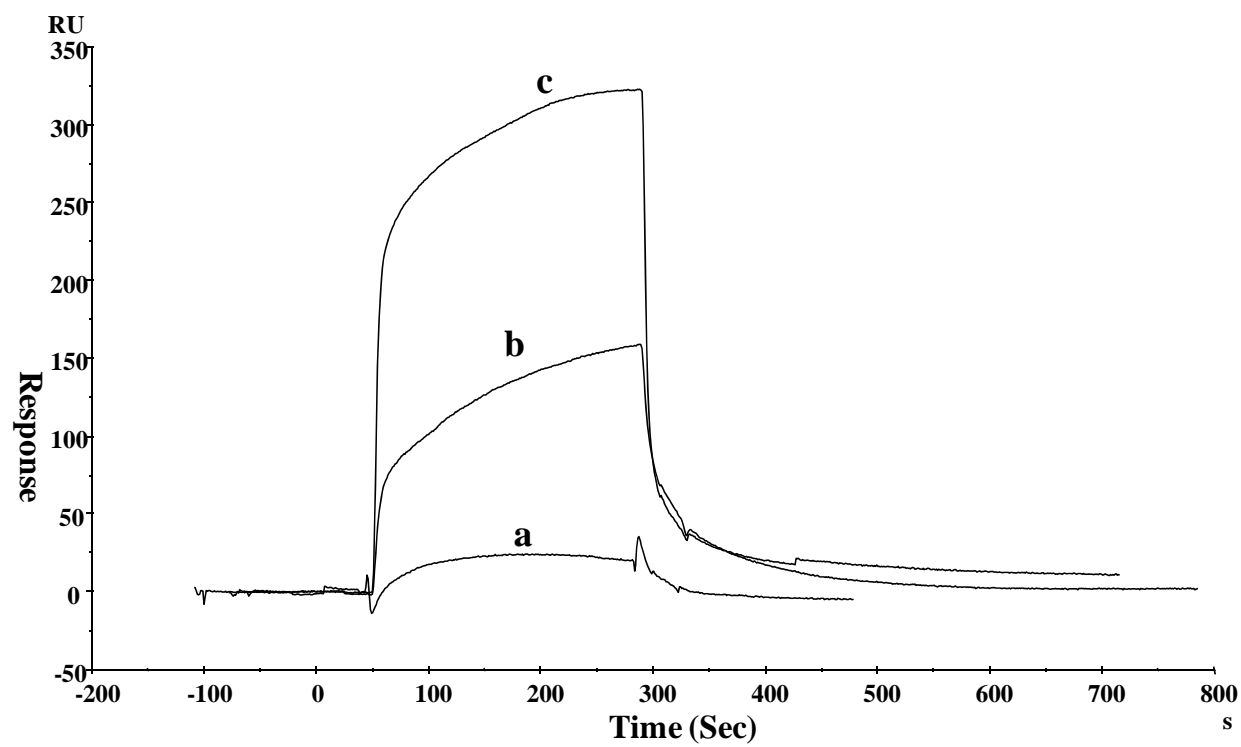

Figure S2

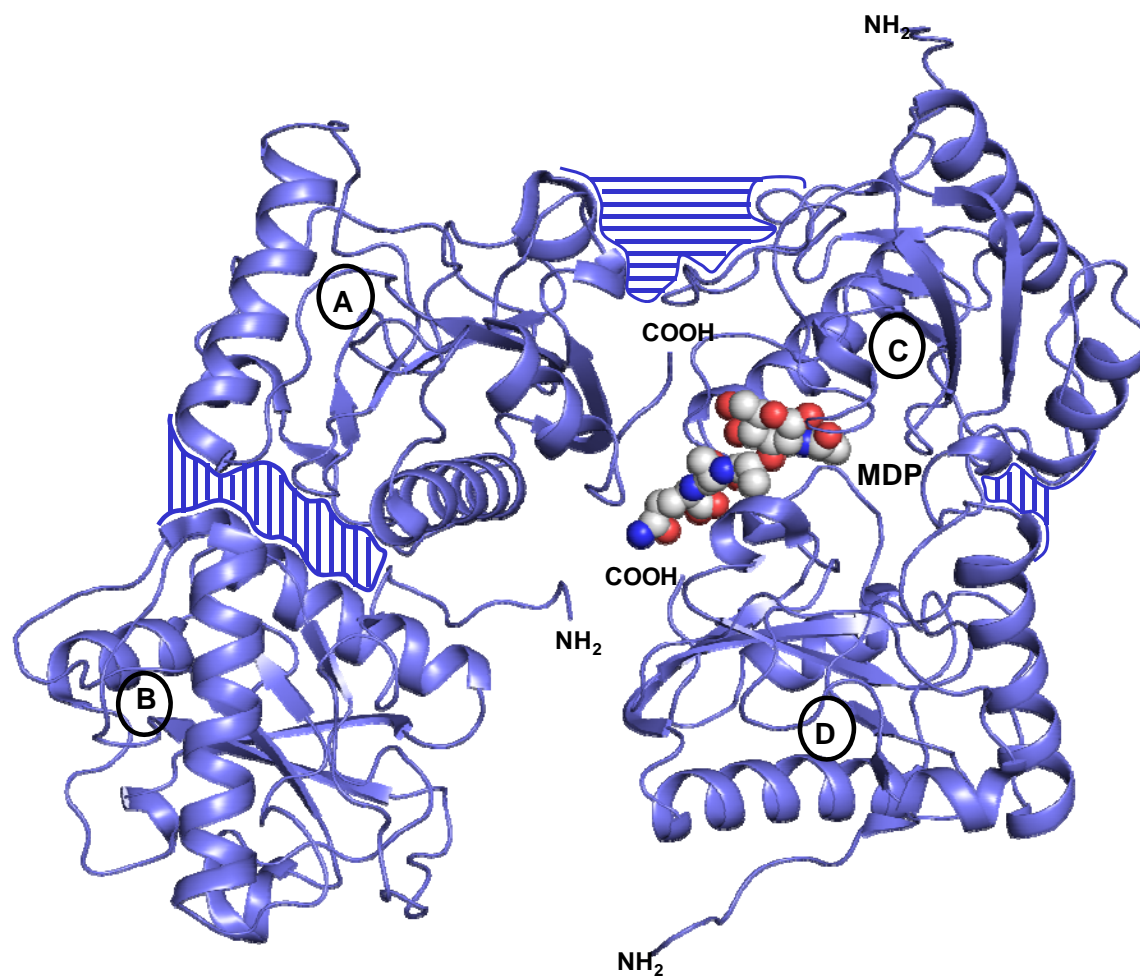

Figure S3

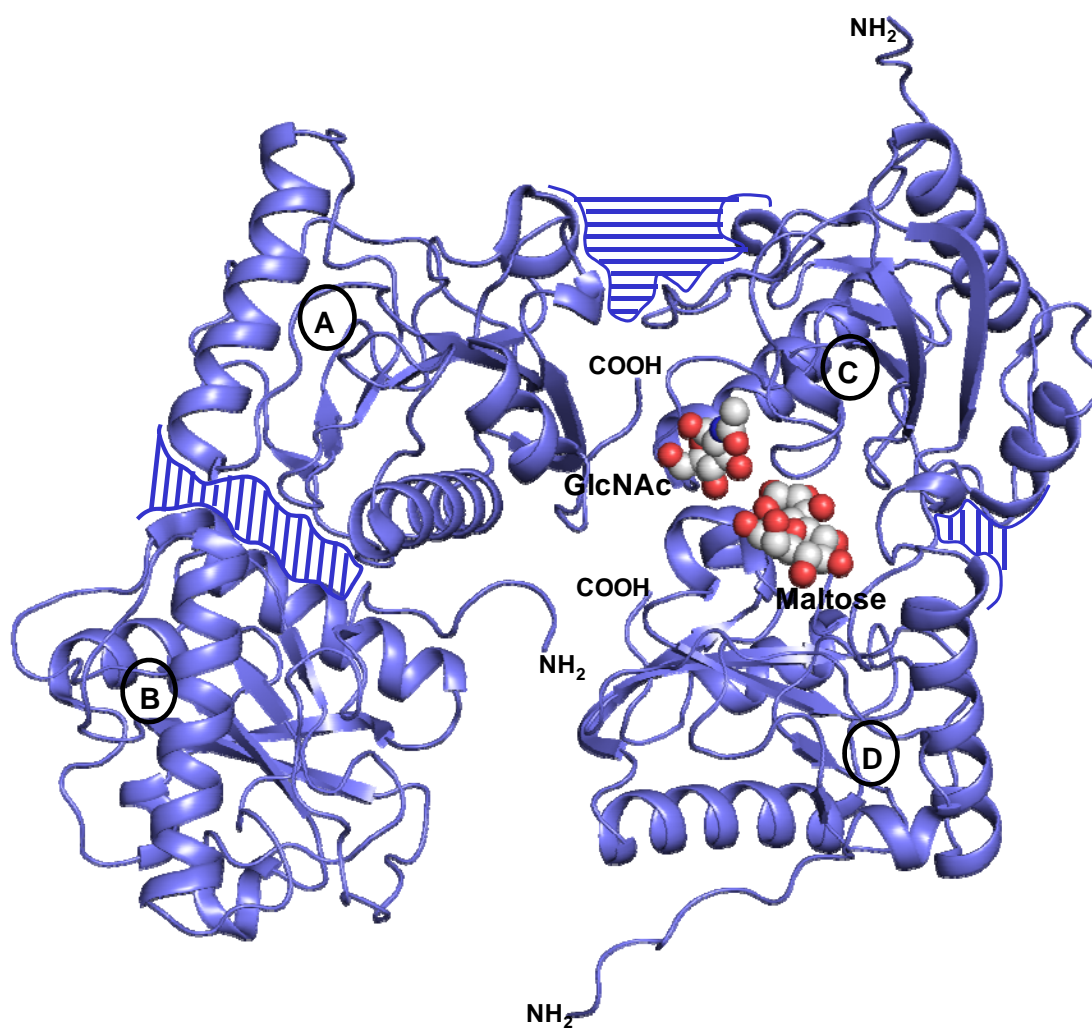

SUPPLEMENTARY INFORMATION

Figure S4

|         |        |        |           |           |        |          |                                          |
|---------|--------|--------|-----------|-----------|--------|----------|------------------------------------------|
|         | 1      | 10     | 20        | 30        | 40     | 50       |                                          |
| CPGRP-S | ----   | EDPPAC | GSIVPRREW | RALASE    | CRERL  | TRPVRYVV | SHTAGSHCDTPASCAQQAQNV 56                 |
| BPGRP-S | -----  | QDCGS  | IVSRGK    | WGALASK   | CSQRL  | RQPVR    | YVVVSHTAGSVCNTPASCQRQAQNV 53             |
| HPGRP-S | -QETED | PACCS  | PIVPR     | NEWKALASE | CAQHL  | SLPLRY   | VVVVSHTAGSSCNTPASCQQQARNV 59             |
| MPGRP-S | -----  | FIVPR  | SEWRAL    | PSEC      | SSRL   | GHPVRY   | VVISHTAGSFCNSPDSCEQQARNV 49              |
| RPGRP-S | -----  | CCFVV  | PRSEW     | KALPSEC   | SKGL   | KKPVRY   | VVISHTAGSFCSSPDSCEQQARNV 51              |
| DPGRP-S |        | KSRQR  | SPAN      | CPTIK     | LKRQ   | WGGK     | PSLGLHYQVRPIRYVVIHHTVTGEC                |
|         | 60     | 70     | 80        | 90        | 100    | 110      |                                          |
| CPGRP-S | QSYHVR | NL     | GWCD      | VGYN      | FLIGED | GLVYEG   | RGWNIKGAHAGFTWNPISIGISFMGNMNRVP 116      |
| BPGRP-S | QYYHVR | ER     | GWCD      | VGYN      | FLIGED | GLVYEG   | RGWNTLGAHSGFTWNP                         |
| HPGRP-S | QHYHMK | TL     | GWCD      | VGYN      | FLIGED | GLVYEG   | RGWNTLGAHSGHLWNPMSIGISFMGNMNRVP 119      |
| MPGRP-S | QHYHKN | EL     | GWCD      | VAYN      | FLIGED | GHVYEG   | RGWNIKGDHTGFIWNPMSIGITFMGNFMDRVP 109     |
| RPGRP-S | QLYQMK | QL     | GWCD      | VAYN      | FLIGED | GHVYEG   | RGWNIKGDHTGFIWNPMSIGITFMGDYSHRVP 111     |
| DPGRP-S | QAYHQ  | NEL    | DFND      | ISYN      | FLIGND | GIVYEG   | TGWGLRGAHT-YGYNAIGTGIAFIGNFVDKLP 119     |
|         | 120    | 130    | 140       | 150       | 160    | 170      |                                          |
| CPGRP-S | PPRAL  | RAA    | QNLL      | ACG       | VAL    | GALRS    | NYEVKGHRDVQPTLSPGDRLYEIIQTWSHYRA-- 171   |
| BPGRP-S | PASAL  | RAA    | QSLL      | ACG       | AARG   | YLTP     | NYEVKGHRDVQPTLSPGDELYKIIQQWPHYRRV- 169   |
| HPGRP-S | TPQAI  | RAA    | QGLL      | ACG       | VAG    | GALRS    | NYVKGHRDVQPTLSPGNQLYHLIQNWPHYRSP- 175    |
| MPGRP-S | AKRAL  | RAA    | NLL       | ECG       | VSR    | GFLRS    | NYEVKGHRDVQSTLSPGDQLYQVIQSWEHYRE-- 164   |
| RPGRP-S | AKRAL  | RAA    | NLL       | KCG       | VSE    | GFLRS    | NYEVKGHRDVQSTLSPGDQLYEIIQSWDHYRE-- 166   |
| DPGRP-S | SDAAL  | QAA    | KDLL      | ACG       | VQ     | QGEL     | SEDYALIAQSQVISTQSPGLTLYNEIQEWPHWLSNP 176 |

SUPPLEMENTARY INFORMATION

---

**Table S1: Hydrogen bonded interactions between CPGRP-S and MDP**

| PROTEIN/WATER  | MDP/WATER | DISTANCE (Å) |
|----------------|-----------|--------------|
| (C) His93 N    | O1        | 3.39         |
| (C) Asn99 ND2  | O1        | 2.57         |
| (C) Gly95 N    | O7        | 3.01         |
| (C) Gln150 NE2 | O7        | 3.50         |
| (C) Asn99 ND2  | O5        | 3.30         |
| (C) Asn99 ND2  | (C) OW192 | 2.81         |
| (C) OW-192     | O5        | 2.99         |
| (C) Trp66 NE1  | O18       | 2.70         |
| (D) Gln150 OE1 | O18       | 3.29         |
| (D) Val149 O   | O18       | 2.84         |
| (C) Leu64 O    | O19       | 3.00         |
| (D) OW179      | O6        | 2.66         |
| (C) Arg85 NH2  | (D) OW179 | 3.15         |
| (C) Arg85 NH1  | (D) OW248 | 3.43         |
| (D) Thr97 OG1  | N4        | 3.26         |
| (D) Trp98 NE1  | O22       | 3.41         |
| (D) Asp148 O   | O22       | 2.98         |
| (D) Asp148 O   | O23       | 3.02         |
| (D) OW-188     | O23       | 3.41         |
| (D) Asp148 O   | (D) OW188 | 2.98         |
| (D) OW177      | N20       | 3.21         |
| (D) Lys144 NZ  | (D) OW177 | 2.63         |



SUPPLEMENTARY INFORMATION

---

**Table S2: Hydrogen bonded interactions between CPGRP-S and GlcNAc**

| PROTEIN/WATER  | GlcNAc/WATER | DISTANCE (Å) |
|----------------|--------------|--------------|
| (D) OW182      | O6           | 3.39         |
| (D)Thr97 OG1   | (D) OW182    | 2.98         |
| (C) OW563      | O6           | 2.77         |
| (A) Asn140 ND2 | (C) OW563    | 3.25         |
| (A) OW277      | O6           | 3.25         |
| (A) Asn140 ND2 | (A) OW277    | 2.88         |
| (D) Gln150 OE1 | O4           | 3.23         |
| (D) Gln150 OE1 | (D) OW183    | 3.15         |
| (D) Ala94 O    | (D) OW183    | 2.78         |
| (C) Pro96 N    | O7           | 3.03         |
| (C) Asn99 ND2  | N2           | 3.44         |
| (C) Lys90 NZ   | (C) OW334    | 2.56         |
| (C) Gly91 O    | (C) OW334    | 2.89         |
| (C) OW535      | O3           | 2.68         |
| (C) Asn99 ND2  | (C) OW535    | 2.73         |

SUPPLEMENTARY INFORMATION

---

**Table S3: Hydrogen bonded interactions between CPGRP-S and Maltose**

| PROTEIN /WATER | MALTOSE/WATER | DISTANCE (Å) |
|----------------|---------------|--------------|
| (C) Gln150 NE2 | O2'           | 2.80         |
| (D) Asn99 ND2  | O6'           | 2.87         |
| (D) Trp66 NE1  | O2            | 2.87         |
| (D) OW558      | O6'           | 2.68         |
| (D) Lys90 NZ   | (D) OW558     | 3.09         |
| (D) OW639      | O3            | 2.85         |
| (D) Gly65 O    | (D) OW639     | 3.22         |
| (D) Asn99 ND2  | O5'           | 3.36         |
| (C) OW185      | O3'           | 3.01         |
